# Supplementary material for: Plasticity of the MAPK Signaling Network in Response to Mechanical Stress
Source: PubMed Central journal article supplement (PMC4099004; doi:10.1371/journal.pone.0101963), 2014-07-15
Supplement: pone.0101963.s003.pdf [file pone.0101963.s003.pdf]

**Table G3**

|              | WT  | <i>msn</i> | <i>slpr</i> | <i>hep</i> | <i>bsk</i> | <i>rl</i> | <i>puc</i> | <i>rac1</i> | <i>p38a</i> | <i>p38b</i> | <i>cdc42</i> |
|--------------|-----|------------|-------------|------------|------------|-----------|------------|-------------|-------------|-------------|--------------|
| WT           | -43 |            |             |            |            |           |            |             |             |             |              |
| <i>msn</i>   |     | -7         |             |            |            |           |            |             |             |             |              |
| <i>slpr</i>  |     |            | -11         |            |            |           |            |             |             |             |              |
| <i>hep</i>   |     |            |             | -13        |            |           |            |             |             |             |              |
| <i>bsk</i>   |     |            |             |            | -17        | -2        | -9         | -16         |             |             |              |
| <i>rl</i>    |     |            |             |            |            | 0         | -6         | -5          |             |             |              |
| <i>puc</i>   |     |            |             |            |            |           | -8         | -19         |             |             |              |
| <i>rac1</i>  |     |            |             |            |            |           |            | -3          |             |             |              |
| <i>p38a</i>  |     |            |             |            |            |           |            |             | -15         |             |              |
| <i>p38b</i>  |     |            |             |            |            |           |            |             |             | -7          |              |
| <i>cdc42</i> |     |            |             |            |            |           |            |             |             |             | -11          |

**Table U3. Differences of Fluorescence Lifetimes (FL) at rest vs'ltt gvej 'eqpf kltqpu of S2R+ cells subjected to distinct single and double'hpqenf qy pu'**

FL measurements not significantly differing between both conditions are displayed in blue. FL values significantly smaller upon stretch versus resting conditions are displayed in red.
