# Supplementary material for: Plasticity of the MAPK Signaling Network in Response to Mechanical Stress
Source: PubMed Central journal article supplement (PMC4099004; doi:10.1371/journal.pone.0101963), 2014-07-15
Supplement: pone.0101963.s004.pdf [file pone.0101963.s004.pdf]

**Table S4**

|             |           | EXPERIMENTAL FRET | CALCULATED FRET | [Bsk]    | [RI]    | [Σkin] | [Puc]   | >Bsk Ext | >RI Ext | >Σkin Ext | >Puc L Ext | <Bsk      | <RI       | <Σkin     | >Puc<br><(Bsk.RI)                | <Puc    | <Puc L      | <Puc L<br>>Puc L Ext |
|-------------|-----------|-------------------|-----------------|----------|---------|--------|---------|----------|---------|-----------|------------|-----------|-----------|-----------|----------------------------------|---------|-------------|----------------------|
|             |           | EXPERIMENTAL FRET | CALCULATED FRET | A1       | A2      | A3     | Puc     | Omega1   | Omega2  | Omega3    | Beta       | K1        | K2        | K3        | $K1^2 \cdot [ (1-K2) / (1+K2) ]$ | Puc     | Puc^5       | Beta.Puc^5           |
| WT          | Resting   | 0,38              | 0,38165         | 0,42781  | 1,785   | 1      | 479,07  | 64365    | 55,652  | 3,2672    | 12,37      | 0,42465   | 0,18578   | 0,0067736 | 0,152075109                      | 479,07  | 2,52345E+13 | 3,12151E+14          |
|             | Stretched | 0,67              | 0,67482         | 0,42781  | 1,785   | 1      | 15,897  | 7,0211   | 1553,4  | 3,4246    | 5214,2     | 0,13106   | 1,7669    | 0,17724   | 0,006207931                      | 15,897  | 1015256,716 | 5293751570           |
| Bsk -       | Resting   | 0,61              | 0,61417         | 0,016196 | 1,785   | 1      | 0,56164 | 64365    | 55,652  | 3,2672    | 12,37      | 0,016196  | 0,72232   | 0,85331   | 0,000152301                      | 0,56164 | 0,055884343 | 0,691289329          |
|             | Stretched | 0,73              | 0,72426         | 0,016196 | 1,785   | 1      | 0,32775 | 7,0211   | 1553,4  | 3,4246    | 5214,2     | 0,015473  | 1,6985    | 0,91265   | 8,8721E-05                       | 0,32775 | 0,00378193  | 19,71974011          |
| RI -        | Resting   | 0,32              | 0,31228         | 0,42781  | 0,26097 | 1      | 549,72  | 64365    | 55,652  | 3,2672    | 12,37      | 0,42419   | 0,023991  | 0,0059083 | 0,175721423                      | 549,72  | 5,02005E+13 | 6,2098E+14           |
|             | Stretched | 0,32              | 0,34186         | 0,42781  | 0,26097 | 1      | 19,586  | 7,0211   | 1553,4  | 3,4246    | 5214,2     | 0,11289   | 0,25772   | 0,14882   | 0,010132742                      | 19,586  | 2882230,774 | 15028527700          |
| Puc -       | Resting   | 0,6               | 0,5811          | 0,42781  | 1,785   | 1      | 54,353  | 64365    | 55,652  | 3,2672    | 12,37      | 0,42745   | 0,90305   | 0,056702  | 0,096010879                      | 54,353  | 474370419   | 5867962083           |
|             | Stretched | 0,65              | 0,69413         | 0,42781  | 1,785   | 1      | 8,1548  | 7,0211   | 1553,4  | 3,4246    | 5214,2     | 0,19793   | 1,7757    | 0,29575   | 0,01411402                       | 8,1548  | 36063,39189 | 188041738            |
| Bsk - RI -  | Resting   | 0,51              | 0,5064          | 0,016196 | 0,26097 | 1      | 0,80164 | 64365    | 55,652  | 3,2672    | 12,37      | 0,016196  | 0,20677   | 0,80298   | 0,000217366                      | 0,80164 | 0,331052519 | 4,09511966           |
|             | Stretched | 0,52              | 0,52765         | 0,016196 | 0,26097 | 1      | 0,6434  | 7,0211   | 1553,4  | 3,4246    | 5214,2     | 0,014836  | 0,26041   | 0,84184   | 0,000174631                      | 0,6434  | 0,110256774 | 574,900873           |
| Bsk - Puc - | Resting   | 0,5               | 0,49274         | 0,016196 | 1,785   | 1      | 0,16207 | 64365    | 55,652  | 3,2672    | 12,37      | 0,016196  | 0,0024585 | 0,95274   | 0,000261667                      | 0,16207 | 0,000111818 | 0,001383193          |
|             | Stretched | 0,56              | 0,55428         | 0,016196 | 1,785   | 1      | 0,12713 | 7,0211   | 1553,4  | 3,4246    | 5214,2     | 0,015908  | 0,26345   | 0,96421   | 0,000200296                      | 0,12713 | 3,32078E-05 | 0,173152163          |
| Puc - RI -  | Resting   | 0,35              | 0,36022         | 0,42781  | 0,26097 | 1      | 88,998  | 64365    | 55,652  | 3,2672    | 12,37      | 0,42722   | 0,1004    | 0,035411  | 0,165864166                      | 88,998  | 5583432055  | 69067054518          |
|             | Stretched | 0,39              | 0,39556         | 0,42781  | 0,26097 | 1      | 11,348  | 7,0211   | 1553,4  | 3,4246    | 5214,2     | 0,16352   | 0,25907   | 0,23182   | 0,021236937                      | 11,348  | 188190,0405 | 981260508,9          |
| Rac -       | Resting   | 0,51              | 0,52014         | 0,42781  | 1,785   | 1      | 566,55  | 3,47E+08 | 2,6142  | 1042,6    | 0,015689   | 0,42781   | 0,0081988 | 0,64792   | 0,181533043                      | 566,55  | 5,83702E+13 | 9,1577E+11           |
|             | Stretched | 0,53              | 0,57899         | 0,42781  | 1,785   | 1      | 455,27  | 37866    | 72,969  | 1092,9    | 6,613      | 0,42273   | 0,24658   | 0,70592   | 0,143352735                      | 455,27  | 1,95589E+13 | 1,29343E+14          |
| Rac - Bsk - | Resting   | 0,51              | 0,50767         | 0,016196 | 1,785   | 1      | 0,95209 | 3,47E+08 | 2,6142  | 1042,6    | 0,015689   | 0,016196  | 0,015866  | 0,99909   | 0,000258214                      | 0,95209 | 0,782330061 | 0,012273976          |
|             | Stretched | 0,62              | 0,61874         | 0,016196 | 1,785   | 1      | 0,60182 | 37866    | 72,969  | 1092,9    | 6,613      | 0,016195  | 0,60725   | 0,99945   | 0,000163184                      | 0,60182 | 0,078946537 | 0,522073446          |
| Rac - RI -  | Resting   | 0,52              | 0,5182          | 0,42781  | 0,26097 | 1      | 570     | 3,47E+08 | 2,6142  | 1042,6    | 0,015689   | 0,42781   | 0,0011914 | 0,64654   | 0,182803604                      | 570     | 6,01692E+13 | 9,43995E+11          |
|             | Stretched | 0,55              | 0,52862         | 0,42781  | 0,26097 | 1      | 541,52  | 37866    | 72,969  | 1092,9    | 6,613      | 0,42178   | 0,030989  | 0,66867   | 0,17255118                       | 541,52  | 4,65664E+13 | 3,07943E+14          |
| Rac - Puc - | Resting   | 0,62              | 0,58238         | 0,42781  | 1,785   | 1      | 93,154  | 3,47E+08 | 2,6142  | 1042,6    | 0,015689   | 0,42781   | 0,048727  | 0,91798   | 0,174517673                      | 93,154  | 7014674775  | 110053232,5          |
|             | Stretched | 0,75              | 0,70883         | 0,42781  | 1,785   | 1      | 50,887  | 37866    | 72,969  | 1092,9    | 6,613      | 0,42724   | 1,0516    | 0,95551   | 0,088971543                      | 50,887  | 341219813,2 | 2256486624           |
| Puc +       | Resting   | 0,34              | 0,31539         | 0,42781  | 1,785   | 1      | 2144,3  | 64365    | 55,652  | 3,2672    | 12,37      | 0,41402   | 0,045156  | 0,0015214 | 0,164006675                      | 2144,3  | 4,53344E+16 | 5,60786E+17          |
|             | Stretched | 0,47              | 0,46665         | 0,42781  | 1,785   | 1      | 1630    | 7,0211   | 1553,4  | 3,4246    | 5214,2     | 0,0018349 | 0,87102   | 0,0020965 | 1,79948E-06                      | 1630    | 1,15064E+16 | 5,99965E+19          |

**Table S4. Consolidated parametric fitted values for the MAPK Network for the distinct single and double knockdowns and the overexpression of Puc at rest and upon stretch**

Experimental AR (FL), fitted AR, A1 ([Bsk]), A2 ([RI]), A3 ([ $\Sigma$ kin]), Puc ([Puc] and <Puc), Omega1 (>Bsk Ext), Omega2 (>RI Ext), Omega3 (> $\Sigma$ kin Ext), Beta (>Puc L Ext), K1 (<Bsk), K2 (<RI), K3 (< $\Sigma$ kin),  $K1^2 \cdot [(1-K2)/(1+K2)]$  [>Puc <(Bsk.RI)], Puc<sup>5</sup> (<Puc L) and Beta.Puc<sup>5</sup> (<Puc L.>Puc L Ext) values for each experimentally analyzed condition at rest and upon stretch. Shadowed in green are the values represented in Figures 4A to 4D, Figures 5C and 5D and Figures 6A to 6D. Shadowed in Orange are the values presented in Figure 5A and 5B.
